# Supplementary material for: An Fe-doped ZnO/BiVO4 heterostructure-based large area, flexible, high-performance broadband photodetector with an ultrahigh quantum yield
Source: Royal Society of Chemistry journal article supplement (doi:10.1039/c9nr10776b), 2020-01-01
Supplement: c9nr10776b1.pdf [file c9nr10776b1.pdf]

## Supplementary Information

### Fe doped ZnO/BiVO<sub>4</sub> heterostructure based large area, flexible, high performance broadband photodetector with ultrahigh quantum yield

Sushmitha Veeralingam<sup>1#</sup>, Pinki Yadav<sup>2#</sup>, Sushmee Badhulika\*

<sup>1</sup>Department of Electrical Engineering, Indian Institute of Technology Hyderabad  
Hyderabad, 502285, India

<sup>2</sup>Department of Physics, National Institute of Technology Kurukshetra, 136119, India

\*Corresponding author: E-mail: sbadh@iith.ac.in; Telephone: 040-23018443 Fax  
04023016032

#Equal contributed authors

#### S1. Device's cross-sectional studies.

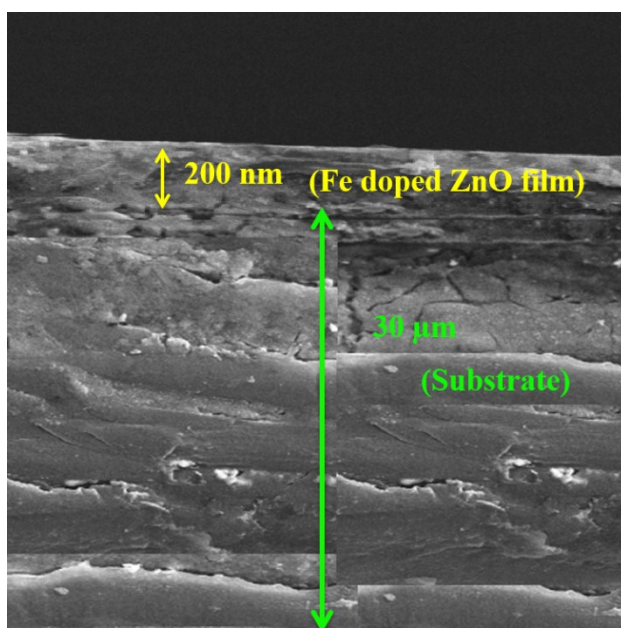

Fig. S1. Cross-sectional FESEM image of the hybrid device.

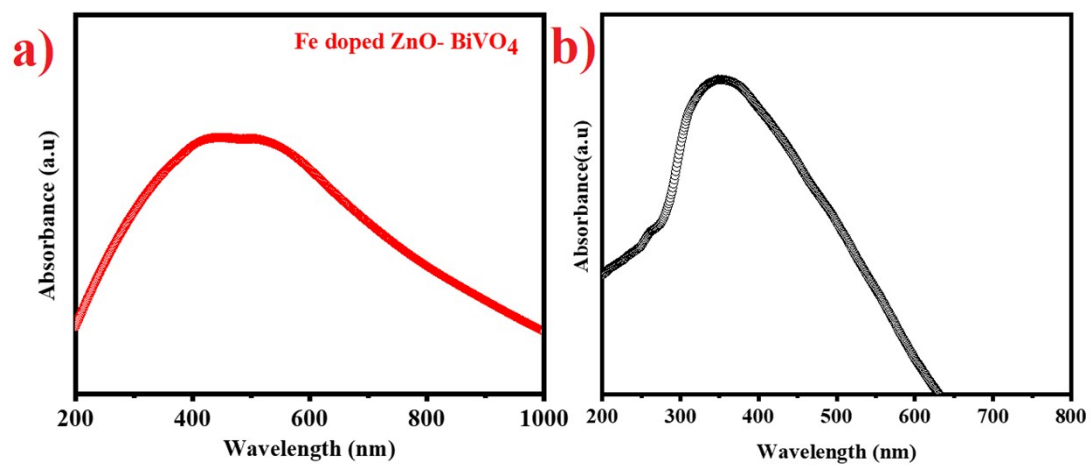

Figure S2 UV-VIS absorbance spectroscopy of a) Fe-ZnO- BiVO<sub>4</sub> and b) ZnO.

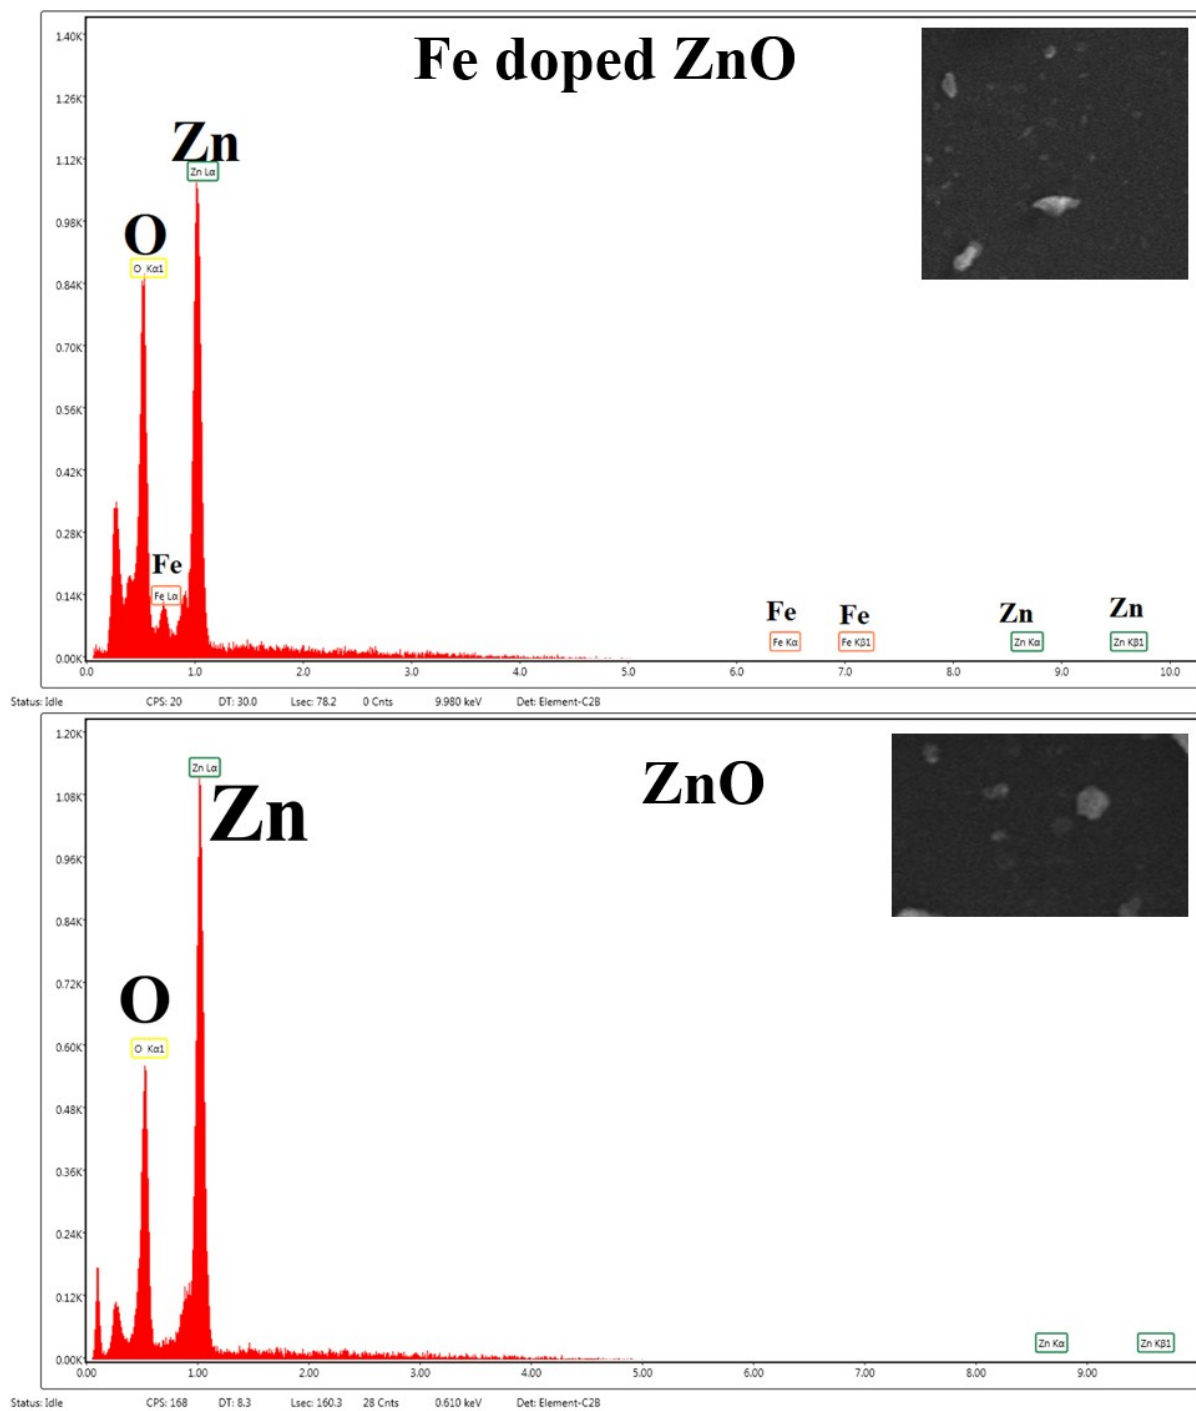

Figure S3. EDAX based elemental composition for a) Fe doped ZnO and b) ZnO thin films.

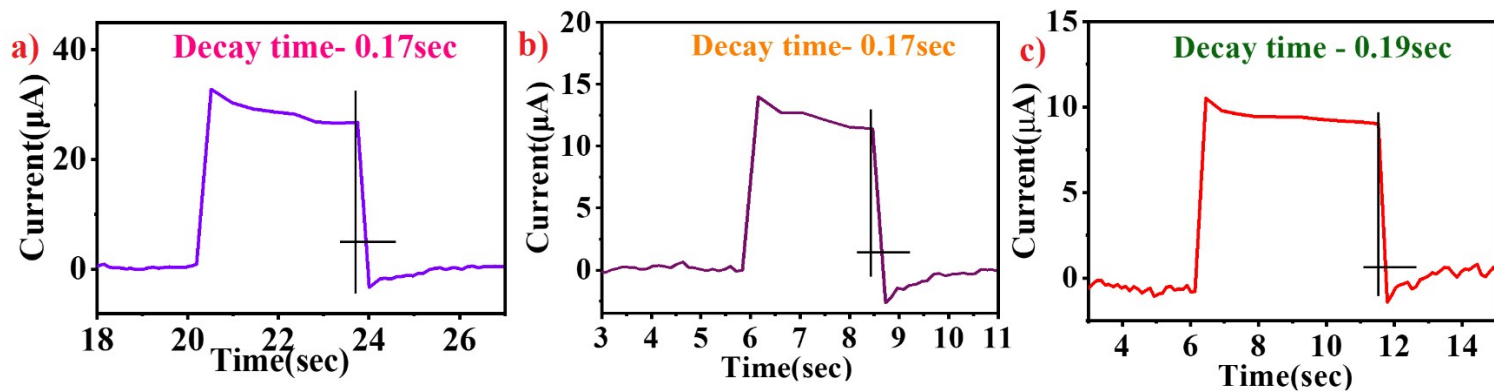

Figure S4. Decay-time response of the device for (a) UV (b) visible and (c) NIR illuminations.

## S2. Electrical Characterisation of pristine $\text{BiVO}_4$ , Fe doped ZnO and ZnO.

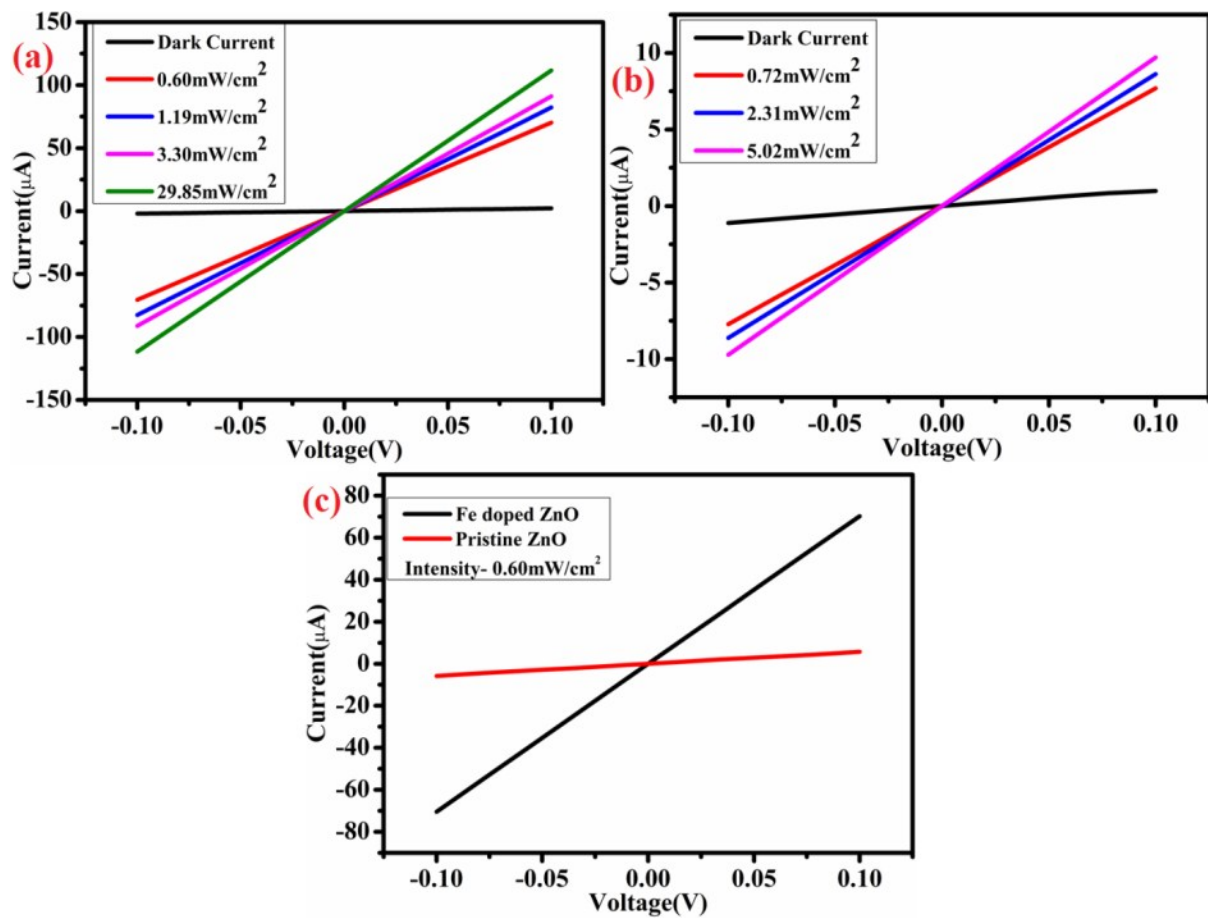

Fig. S5. Control sample studies indicating Current vs Voltage studies of (a) Fe doped ZnO films (b)  $\text{BiVO}_4$  nanofibers (c) Comparative I-V studies of Fe doped ZnO and pristine ZnO

### S3. Interface studies of Fe doped ZnO film vs. substrate and built-in potential studies.

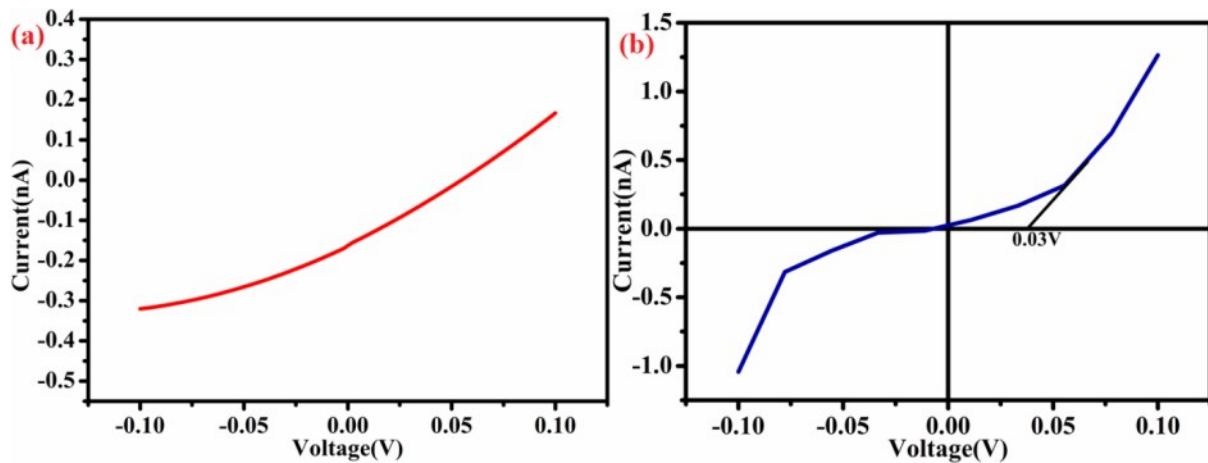

Fig. S6. (a) I-V response of Fe doped ZnO and ITO junction. (b) graph displaying the built-in potential for FZO-BVO junction.

### S4. Formula used to calculate electron affinity of Fe doped ZnO

$$\Phi_B = \Phi_m - \chi_s$$

Where  $\Phi_B$  is the built-in potential at the interface of materials,  $\Phi_m$  is the work function of ITO and  $\chi_s$  is the electron affinity of the Fe doped ZnO. The as calculated value of electron affinity is 4.66eV.

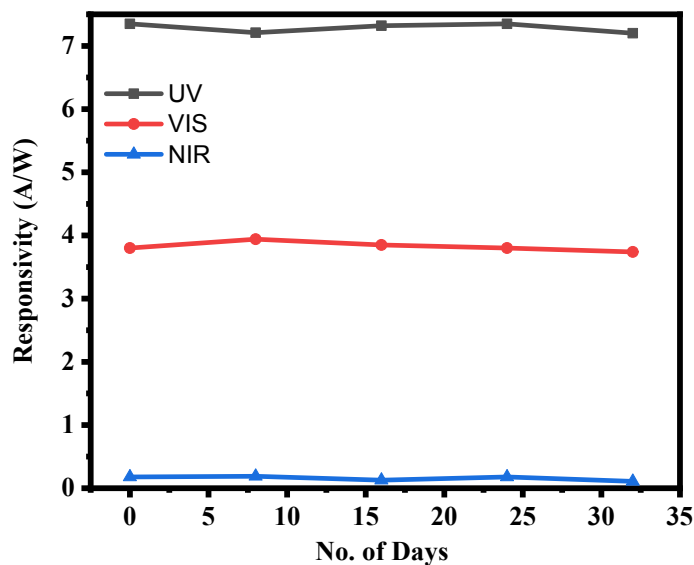

Fig. S7 Responsivity of the device w.r.t. number of days towards all three wavelengths

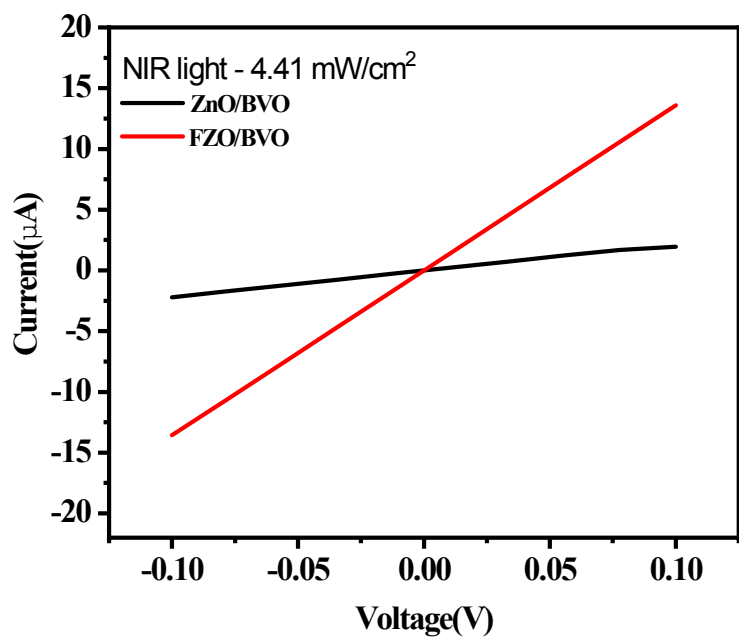

Figure S8. Control sample studies indicating Current vs Voltage studies of Fe doped ZnO/BiVO<sub>4</sub> and ZnO/BiVO<sub>4</sub> thin films.

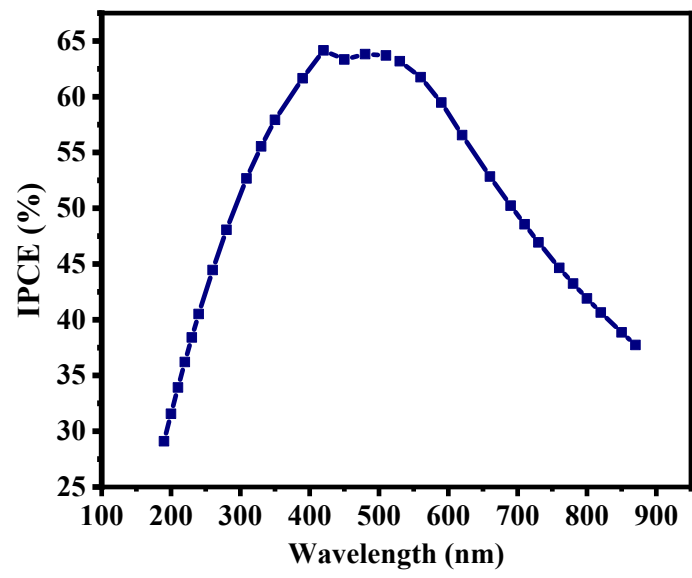

Figure S9. The IPCE spectrum for the FZO/BVO device
